# Supplementary material for: Prenatal Glucocorticoid Administration Accelerates Maturation in the Hepatocytes of Fetal Rats
Source: Research Square preprint supplement (doi:10.21203/rs.3.rs-235968/v2), 2021-07-29
Supplement: Supplementary file 1 [file 9af090f55703774bf7c7f296.xlsx]

## Sheet: Figure.1
	Figure.1-B
			Mean	SE	p-value
		19F	69.8167	2.69804	1
		21F	145.048	13.2376	0.0136
		1N	164.146	6.30505	0.0016
		3N	162.901	5.15337	0.0019
		5N	230.996	10.1721	<.0001
		8W	359.137	36.0164	<.0001
	Figure.1-C
			Mean	SE	p-value
	19F	－	69.8167	2.69804	1
		1	105.746	4.95217	<.0001
		2	106.423	3.64255	<.0001
			Mean	SE	p-value
	21F	－	145.048	13.2376	1
		1	164.852	12.3296	0.4804
		2	167.481	13.9867	0.3999

## Sheet: Figure.2
	Figure.2-A
	Ki-67		Mean	SE	p-value
		19F	1	0.196856	1
		21F	0.439203	0.0392147	0.0407
		1N	0.262852	0.0556715	0.0093
		8W	0.0150072	0.0135994	0.0062
	Figure.2-B
	Ki-67		Mean	SE	p-value
	19F	－	1	0.190445
		1	0.528802	0.0984439	0.0748
		2	0.90916	0.281606	0.408
	Ki67		Mean	SE	p-value
	21F	－	0.364479	0.0405531
		1	0.47121	0.0971521	0.8998
		2	0.410822	0.0489224	1
	Figure.2-C
	Cyclin B		Mean	SE	p-value
		19F	1	0.0485243
		21F	0.516026	0.10197	0.041
		1N	0.260782	0.0233971	0.0062
		8W	0.00608278	0.00210418	0.0096
	Figure.2-D
	Cyclin B		Mean	SE	p-value
	19F	－	1	0.0755516
		1	0.553293	0.0972072	0.0139
		2	0.774454	0.136885	0.0999
	Cyclin B		Mean	SE	p-value
	21F	－	0.564936	0.0905073
		1	0.316316	0.066293	0.0286
		2	0.270447	0.0674871	0.0552
	Figure.2-E
			Mean	SE	p-value
		19F	1	0.0550683
		21F	0.479177	0.0378054	0.0062
		1N	0.482027	0.0806974	0.0093
		8W	0.00553523	0.00234637	0.0062
	Figure.2-F
			Mean	SE	p-value
	19F	－	1	0.0700492
		1	0.743829	0.110359	0.17
		2	0.833214	0.0998238	0.408
			Mean	SE	p-value
	21F	－	0.473099	0.03745
		1	0.202593	0.0255563	0.0042
		2	0.197407	0.0160392	0.0042

## Sheet: Figure.3
	Figure.3-A
	Thy1 mRNA		Mean	SE	p-value
		19F	1	0.0910826
		21F	0.917043	0.254535	0.9637
		1N	0.0621387	0.0212005	0.0061
		8W	0.00842783	0.00372648	0.0061
	Figure.3-B
	Thy1 mRNA		Mean	SE	p-value
	19F	－	1	0.0848831
		1	0.503755	0.177116	0.0995
		2	1.04512	0.384404	0.6605
	Thy1 mRNA		Mean	SE	p-value
	21F	－	0.813541	0.221642
		1	0.352997	0.138142	0.1676
		2	0.34235	0.119994	0.2711
	Figure.3-D
	Thy1		Mean	SE	p-value
	19F	－	36.4162	1.43401	1
		1	36.5099	1.13061	0.9986
		2	35.6277	1.86992	0.9059
	Thy1		Mean	SE	p-value
	21F	－	42.3216	1.4023	1
		1	37.5173	2.65903	0.2692
		2	28.7406	2.62067	0.0016
	Figure.3-E
	DLK1 mRNA		Mean	SE	p-value
		19F	1	0.0773019
		21F	0.252432	0.0671202	0.0074
		1N	0.0406495	0.0136948	0.0062
		8W	5.74841e-06	5.74841e-06	0.0062
	Figure.3-F
	DLK1 mRNA		Mean	SE	p-value
	19F	－	1	0.078011
		1	0.87571	0.257227	0.8283
		2	1.52667	0.344929	0.3357
	DLK1 mRNA		Mean	SE	p-value
	21F	－	0.403475	0.0973721
		1	0.458801	0.145727	0.5727
		2	0.571898	0.196439	0.7472

## Sheet: Figure.4
	Figure.4-A
	AFP mRNA		Mean	SE	p-value
		19F	1	0.0670468
		21F	0.826693	0.0868803	0.5196
		1N	0.311029	0.0852919	0.0062
		8W	6.40363e-06	2.31343e-06	0.0062
	Figure.4-B
	AFP mRNA		Mean	SE	p-value
	19F	－	1	0.0707239
		1	1.50493	0.217826	0.0999
		2	1.48542	0.144249	0.0286
	AFP mRNA		Mean	SE	p-value
	21F	－	0.813213	0.0801537
		1	1.01074	0.0716667	0.2167
		2	0.993813	0.254746	0.9881
	Figure.4-C
	Albumin mRNA		Mean	SE	p-value
		19F	1	0.120508	1
		21F	4.682	0.341692	0.0062
		1N	1.71124	0.545457	0.9985
		8W	6.45039	2.23876	0.0138
	Figure.4-D
	Albumin mRNA		Mean	SE	p-value
	19F	－	1	0.0941034
		1	3.42372	0.472825	0.0042
		2	5.79469	1.43536	0.0042
	Albumin mRNA		Mean	SE	p-value
	21F	－	6.39842	2.52905
		1	10.4754	1.52508	0.0552
		2	8.37466	1.4121	0.1341
	Figure.4-E
	Albumin		Mean	SE	p-value
		19F	20.1901	5.62041	1
		21F	47.8155	8.67545	0.0039
		1N	43.565	2.81779	0.0159
		5N	36.7978	4.45257	0.1174
		8W	67.4114	3.56565	<.0001
	Figure.4-F
	Albumin		Mean	SE	p-value
	19F	－	20.1901	5.62041	1
		1	50.3578	6.18283	0.002
		2	46.4317	4.92441	0.0063
	Albumin		Mean	SE	p-value
	21F	－	47.8155	8.67545	1
		1	57.1636	3.32539	0.4373
		2	46.5971	3.94485	0.9841

## Sheet: Figure.5
	Figure.5-A
	HGF mRNA		Mean	SE	p-value
		19F	1	0.0558456
		21F	1.4831	0.0976405	0.0138
		1N	2.00576	0.397757	0.0407
		8W	0.594177	0.148904	0.2294
	Figure.5-B
	HGF mRNA		Mean	SE	p-value
	19F	－	1	0.0488232
		1	1.61922	0.174987	0.0201
		2	2.11231	0.409732	0.1314
	HGF mRNA		Mean	SE	p-value
	21F	－	2.3632	0.327985
		1	4.83253	1.07899	0.0748
		2	6.75724	1.95894	0.0095
	Figure.5-D
	HGF		Mean	SE	p-value
	19F	－	15.5354	3.0792	1
		1	34.3825	1.53668	<.0001
		2	25.3597	1.85547	0.0107
	HGF		Mean	SE	p-value
	21F	－	49.1532	3.42008	1
		1	59.8611	3.25978	0.1289
		2	49.3769	4.91632	0.9988

## Sheet: Figure.6
	Figure.6-A
	HNFa mRNA		Mean	SE	p-value
		19F	1	0.121905
		21F	2.27434	0.311679	0.0093
		1N	2.48869	1.13883	1
		8W	8.40951	3.55832	0.3576
	Figure.6-B
	HNFa mRNA		Mean	SE	p-value
	19F	－	1	0.0728246
		1	1.64189	0.159293	0.0286
		2	3.6876	0.341251	0.0042
	HNFa mRNA		Mean	SE	p-value
	21F	－	3.74878	0.457973
		1	11.8059	1.03479	0.0042
		2	10.9892	1.33532	0.0042
	Figure.6-C
	HNFa protein(ELISA)		Mean	SE	p-value
		19F	18.2099	3.19633	1
		21F	34.8556	2.66994	0.3244
		1N	99.5553	9.88199	<.0001
		8W	236.895	10.8325	<.0001
	Figure.6-D
	HNFa protein(ELISA)		Mean	SE	p-value
	19F	－	18.2099	3.19633	1
		1	31.5367	1.82104	0.0888
		2	51.7011	6.24089	0.0006
	HNFa protein(ELISA)		Mean	SE	p-value
	21F	－	34.8556	2.66994	1
		1	65.6	2.84377	0.0357
		2	74.4072	12.7468	0.01
	Figure.6-D
	HNFa protein		Mean	SE	p-value
	19F	－	34.9049	2.70653	1
		1	48.3674	2.12536	0.0006
		2	42.7756	1.73826	0.0381
	HNFa protein		Mean	SE	p-value
	21F	－	43.2842	3.12101	1
		1	60.7952	1.61069	0.0002
		2	65.0683	2.19808	<.0001

## Sheet: Figure Suppl 1
	Figure Supplement 1-A
	mTOR		Mean	SE	p-value
	19F	－	1	0.0505542
		1	0.781028	0.0656911	0.0748
		2	0.9063	0.125824	0.0552
	mTOR		Mean	SE	p-value
	21F	－	0.694085	0.0491972
		1	1.02719	0.175005	0.2719
		2	0.68748	0.0602808	0.7472
	Figure Supplement 2-A
	Largen		Mean	SE	p-value
	19F	－	1	0.0901909
		1	0.624275	0.186893	0.3357
		2	0.635875	0.183387	0.3357
	Largen		Mean	SE	p-value
	21F	－	0.72804	0.144947
		1	1.13064	0.618541	0.6605
		2	0.836157	0.445373	0.3357

## Sheet: Figure Suppl 2
	Figure.6-A
	G6Pase mRNA		Mean	SE	p-value
		19F	1	0.327809
		21F	160.087	65.7684	0.0062
		1N	236.016	101.035	0.0062
		8W	516.99	266.644	0.0062
	Figure.6-B
	G6Pase mRNA		Mean	SE	p-value
	19F	－	1	0.324649
		1	1.39616	0.451874	0.8987
		2	17.9426	11.6306	0.6605
	G6Pase mRNA		Mean	SE	p-value
	21F	－	160.754	65.5245
		1	369.903	183.892	0.9534
		2	290.828	154.698	1
	Figure.6-A
	TAT mRNA		Mean	SE	p-value
		19F	1	0.394459
		21F	53.2409	26.0706	0.0092
		1N	534.093	153.651	0.0061
		8W	4423.95	1446.41	0.0061
	Figure.6-B
	TAT mRNA		Mean	SE	p-value
	19F	－	1	0.413178
		1	2.05284	1.01356	0.899
		2	1.56063	0.493485	0.4578
	TAT mRNA		Mean	SE	p-value
	21F	－	51.2204	26.6624
		1	43.8837	25.6888	1
		2	23.0271	9.47194	0.8283
